# Supplementary material for: Multiscale carbon nanosphere–carbon fiber reinforcement for cement-based composites with enhanced high-temperature resistance
Source: Springer Nature journal article supplement (doi:10.1007/s10853-014-8655-8), 2014-12-23
Supplement: MOESM1 [file 3528666]

**Supplementary material**

**Multiscale** **carbon nanosphere-carbon fiber** **reinforcement for** **cement-based composites with** **enhanced** **high-temperature resistance**

Tao Han a*, Huiqi Wang a, b[[1]](#footnote-1), Xiuzhi Jin a, Jinhua Yang b, Yongsheng Lei a, Fang Yang a, Xueteng Yang a, Zechao Tao b, Quangui Guob, Lang Liu b

*a Institute of Inorganic Non-metallic materials, School of Materials Science and Engineering,* *North University of China, Taiyuan 030051, China*

*b* *Key Laboratory of Carbon Materials,* *Institute of Coal Chemistry, Chinese Academy of Sciences, Taiyuan 030001, China*

**
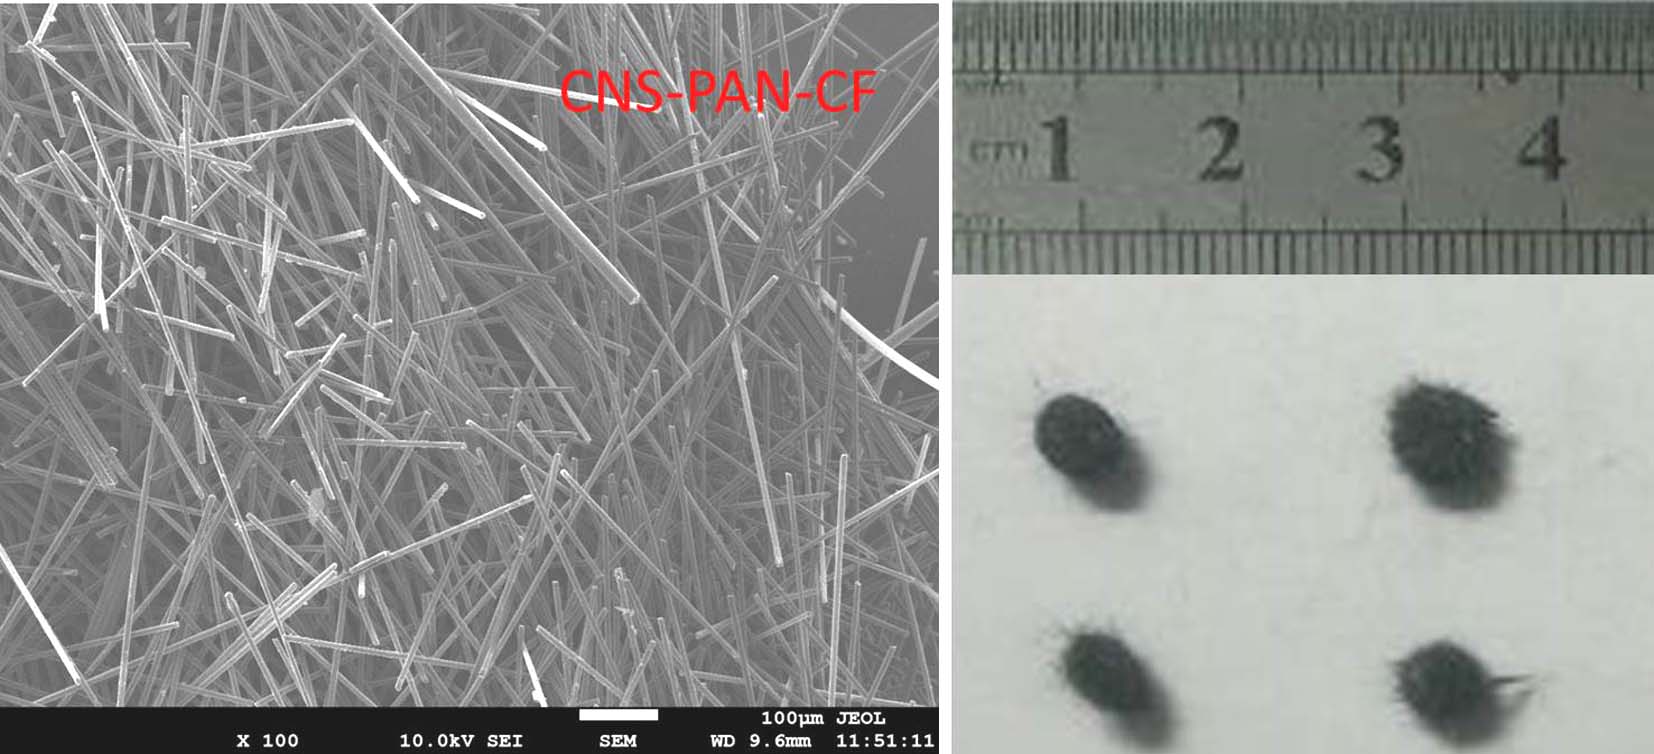
**

**Fig. S1** SEM and optical images of CNS-PAN-CF.


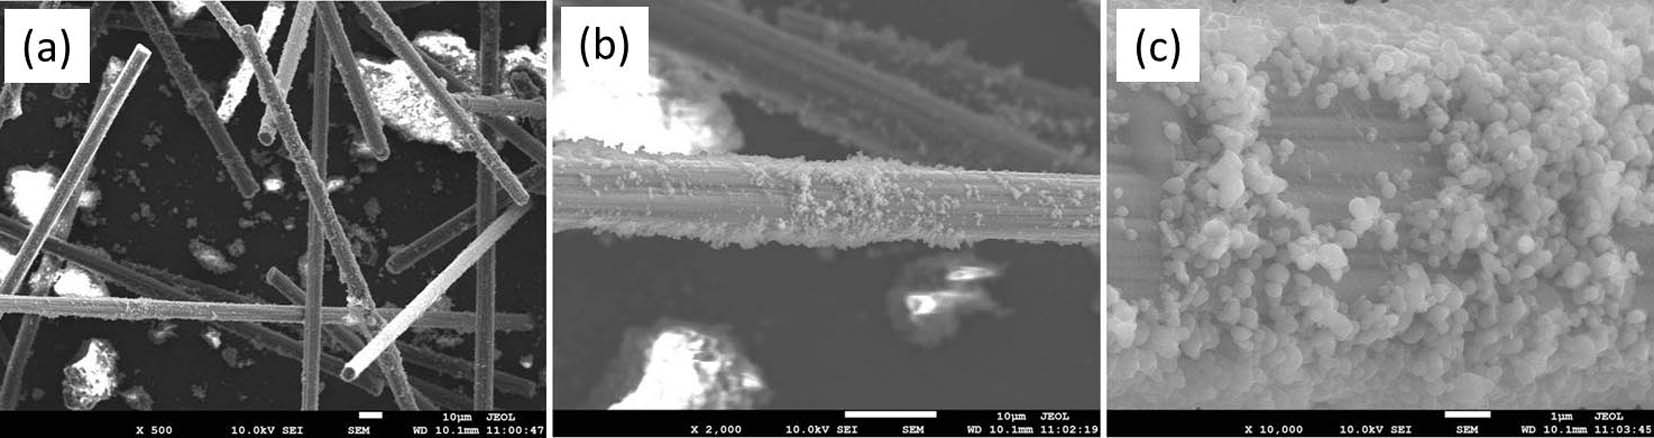


**Fig. S2** SEM images of CNS-PAN-CF (a) ×500, (b) ×2000, and (c) ×10000.


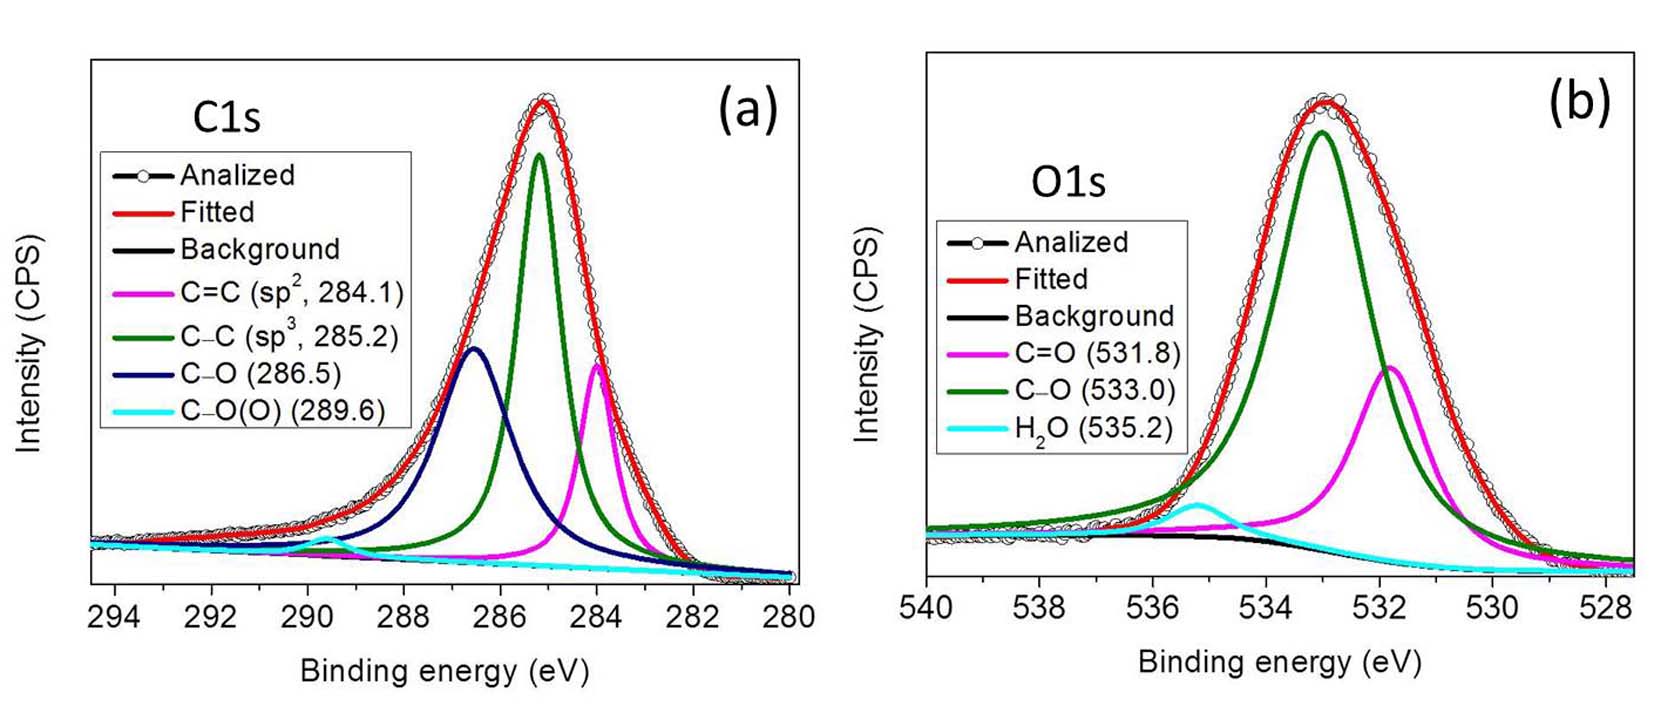


**Fig. S3** Gaussian fitted XPS of CNS-PAN-CF (a) the C1s signal, (b) the O1s signal.

1. Corresponding author: Tel.: +86-351-3921751; fax: +86-351-3922012.

   E-mail address: hqiwang@163.com (H. Wang). oatnah@163.com (T. Han) [↑](#footnote-ref-1)
